# Supplementary material for: Are Protein Domains Modules of Lateral Genetic Transfer?
Source: PLoS One. 2009 Feb 20;4(2):e4524. doi: 10.1371/journal.pone.0004524 (PMC2639706; doi:10.1371/journal.pone.0004524)
Supplement: Table S1 — Number of gene sets (alignments), sequences, annotated domains and the inferred recombination breakpoints in this study. N/A denotes not applicable. (0.01 MB PDF) [file pone.0004524.s002.pdf]

## Supporting Information

**Table S1.** Number of gene sets (alignments), sequences, annotated domains and the inferred recombination breakpoints in this study. N/A denotes not applicable.

|                                                                         | Gene set<br>alignments | Sequences | Domains | Recombination<br>breakpoints |
|-------------------------------------------------------------------------|------------------------|-----------|---------|------------------------------|
| All alignments (gene sets)                                              | <b>1,462</b>           | 11,128    | N/A     | N/A                          |
| Alignments with domain<br>annotations                                   | <b>81</b>              | 657       | 861     | N/A                          |
| Alignments in which<br>breakpoints are found                            | <b>286</b>             | 2,355     | N/A     | 820                          |
| Alignments with domain<br>information in which<br>breakpoints are found | <b>48</b>              | 415       | 238     | 166                          |
